# Supplementary material for: CDC25A inhibition suppresses cell proliferation and induces G1/S‑phase cell cycle arrest in nasopharyngeal carcinoma
Source: PubMed Central journal article supplement — Mol Med Rep. 2023 Apr 12;27(5):109. doi: 10.3892/mmr.2023.12996 (PMC10119622; doi:10.3892/mmr.2023.12996), 2023-04-12
Supplement: Supplementary_Data.pdf [file Supplementary_Data.pdf]

Table SI. Sequence of full length of CDC25A promoter.

| Name            | Full-length sequence                                                                                                                                                                                                                                                                                                                                                                                                                                                                                                                                                                                                                                                                                                                                                                                                                                                                                                                                                                                                                                                                                                                                                                                                                                                                                                                                                                                                                                                                                                                                                                                                                                                                                                                                                                                                                                                                                                                                                                                                                                                                                                                                                                                                                                                                                                                                                           |
|-----------------|--------------------------------------------------------------------------------------------------------------------------------------------------------------------------------------------------------------------------------------------------------------------------------------------------------------------------------------------------------------------------------------------------------------------------------------------------------------------------------------------------------------------------------------------------------------------------------------------------------------------------------------------------------------------------------------------------------------------------------------------------------------------------------------------------------------------------------------------------------------------------------------------------------------------------------------------------------------------------------------------------------------------------------------------------------------------------------------------------------------------------------------------------------------------------------------------------------------------------------------------------------------------------------------------------------------------------------------------------------------------------------------------------------------------------------------------------------------------------------------------------------------------------------------------------------------------------------------------------------------------------------------------------------------------------------------------------------------------------------------------------------------------------------------------------------------------------------------------------------------------------------------------------------------------------------------------------------------------------------------------------------------------------------------------------------------------------------------------------------------------------------------------------------------------------------------------------------------------------------------------------------------------------------------------------------------------------------------------------------------------------------|
| CDC25A promoter | 5'-CTCCCCCTTCTCCAGCAACCTTGACCTTTAGTTTTAATCTCCTTTAGGACG<br>TGCCCCCACCCTACTGCCTTCCCAGTCCCCGCCCTCCTCTAGGTGCC<br>ACCATCCCTCCACAAACCACAGCTATTGTCATGGTAATAATTCCATTATTAG<br>AAGGAGCTTTATGCTCAGCGGACCAGAGCTCCCTGAGAGCAGGGATTGT<br>GGTATTATTTCAAGCACTGAATTTGTTCTAGTAATCCTTAAATAAACATATG<br>TTGAATGAATGAATGCAGTAACAGGAATGTTGAGCCAAGTTTTGTTTTTGT<br>TTTTTGAGACGGAGTCTCGCTCTGTTGCCAGGCTGGAGTGCAGTGGCTC<br>GGTCTTGGCTCACTGCAAGCTCCGCCTCCCGAGTTCAGCCATTCTTCTGC<br>CTCAGCCTCCCGAGTAGCTGGGACTACAGGCGCCCGCCACCACGCCCGGT<br>AATTTTTTTGATTTTTAGTAGAGCCGGGTTTTACCATGTTAGCCAGGATG<br>GTCTCGATCTCCTGACCCCGTGATCCGCCCGCCTCGGTCTCCCAAAGTGC<br>TGGGATTACAGGCGTGAGCCACCGCTCCCGGCCTGTTGAGCCAAGTATTA<br>AACCACATAAAACACAGGAGGAGAGGAAAGTATTCAGAGATACGACAGG<br>GAGAACTATTTGAAACAGTGGGACCACAGACCATGTGAACTGTGCAGAG<br>AGGCCTAAATAGCCTGGGGTTTTCTGGAGGGAAGGGAGGTTCTCTGGGTGG<br>TGGAGCACTGGTGCACAGAAAAGGAGATGAATCCTGAGAGAGAGGTTCC<br>TCACTGTGAAGGGTCTGGTGTGGGGCCAAAGGTTTTGGGGTTTTCCACCTG<br>TCCAGCATGGCTTTTTCAAAGTGTAGGGTTTTTTTTTTTTTTGAGTGGGGGCA<br>GGGGGTGTCTCACTTTGTTGCCAGGCTGGTCTCAAATTCGTGGGCTCAG<br>GCAATCCTCCCACCTCGCCCTCCCAAAGTGCTGGGATGATAGGCGTGAGC<br>CACTAAGCCCAGCAGTAGGTTGCAATTAATCATGCACTTATGGCCCTCAA<br>AATCCGTCTAGGAGCTGCCACAGG <b>TTCGGCGCT</b> GTAAAAGTAAATATGCC<br>CACTTAGAAAATGGGGATAATTCCTATGTCACAGAGTTGTAAAGATTAAT<br>GAATTAATACAGATTAACACACTGGGAACAGTGTCAAGTGCATAAGCATT<br>TGAAACTTTAGCTATTATTTGCTATTATTGTGTTTGTGTTATTCTCTCTA<br>GGAGCTCCCAGGGGGCTAAGAAGTGGTGGGAAAGAAAGAAATGATTCTA<br>AGAGCATCCAATAAGGGCTAGAATGGAAGTGAGCAAAAATGCTGAGGC<br>CCACAGCACAGGTTGTAAGTGCAGGGTTCAAATCCCATGAGGCCAGCAGC<br>ACCCAGGGTCTGTGAGCCCTCCAGAGTTGGGCCCTGGTGGTTCGAGTCCA<br>GTCCTGGGGGTCATTGCATTCCCTCCCTCATTATAAAATGGGGCCTGGAGG<br>CCCGGGGCGGAAGAAAGGGGTCCACAATACTGCACGGTTAGAGGCCGAG<br>CCAAGGCTGGATCCGGCCAGACCTCCACAGGTCTTCCTTAGCCTCCACAT<br>TGCCCTCAGAGTGTGGGGCGCCCGGCTGGGGGCGAGGTAGCGGAGGCCCA<br>AAGGGGGCCGAAGCTAACTGGACGGCAGCTCGCGATGGGAACACTACGCTT<br>CCCAGCATGCGACGGGGCAAAGGGGCTTTTCAGCCGCGAGCAGCGCCTC<br>GCAGGTTCTGCTGGGAGTTTTCAATTGACCTCTGCTCCCCCTCTCATTTTGA<br>TCCCCGCTCTTCTGCTCTGGGCTCCGCCCCCTTCTGAGAGCCGATGACCT<br>GGCAGAGTCCCGCGAGCCGCTTTCTTCTTCCCCTCTCATTGGCCCAGCCTA<br>GCTGCCATTCGGTTGAGAGGAGGAGAAGTTGCTTACTGATTGGTGGATTCC<br>CG <b>TTTGGCG</b> CCAATAAGGAAAGGGGGCGGGGCAGCAGCTGGCCCCAC<br>TGAGCCGCTATTACCGCGAAAGGCCGGCCTGGCTGCGACAGCCTGGGTAA<br>GAGGTGTAGGTCGGCTTGGTTTTCTGCTACCCGGAGCTGGGCAAGCGG-3' |
